# Supplementary material
Source: publisher figshare collection journal article supplement (https://future-science-group.figshare.com/ndownloader/files/31257868)

***Figure Is - PRISMA of Secondary Literature (HTA Report, Systematic Reviews and Meta-analysis)***


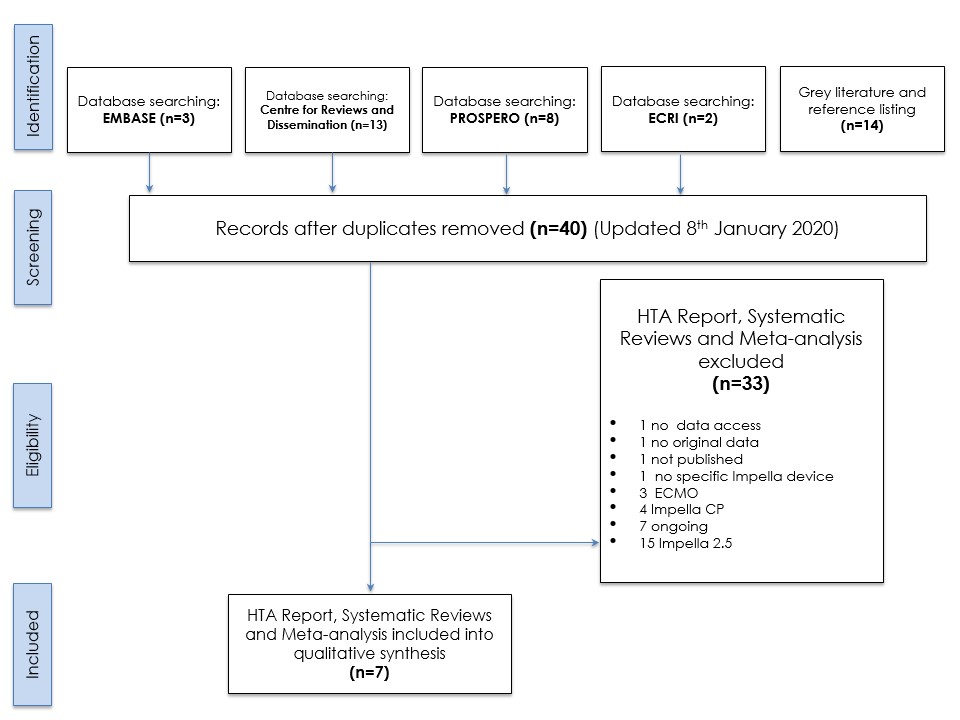

Supplement: Supplementary file 1 [file 31257868]
